# Supplementary material for: Synthesis of thermoresponsive nonconjugated fluorescent branched poly(ether amide)s via oxa-Michael addition polymerization
Source: Royal Society of Chemistry journal article supplement (doi:10.1039/d1py01437d), 2021-12-14
Supplement: d1py01437d1.pdf [file d1py01437d1.pdf]

## Supporting Information

### **Synthesis of Thermoresponsive Nonconjugated Fluorescent Branched Poly(ether amide)s via Oxa-Michael Addition Polymerization**

Qimin Jiang<sup>a</sup>, Liang Zhao<sup>a</sup>, Yongzhuang Du<sup>a</sup>, Wenyan Huang<sup>a</sup>, Xiaoqiang Xue<sup>a</sup>,  
Hongjun Yang<sup>a</sup>, Li Jiang<sup>a</sup>, Qilin Jiang<sup>c\*</sup>, Bibiao Jiang<sup>a,b\*</sup>

*<sup>a</sup>Jiangsu Key Laboratory of Environmentally Friendly Polymeric Materials, School of  
Materials Science and Engineering, Jiangsu Collaborative Innovation Center of  
Photovoltaic Science and Engineering, Changzhou University, Changzhou, Jiangsu, P.  
R. China 213164.*

*<sup>b</sup>Changzhou University Huaide College, Jingjiang, Jiangsu, P. R. China 214500.*

*<sup>c</sup>School of Chemistry, University of Edinburgh, Joseph Black Building, David Brewster  
Road, Edinburgh, U.K. EH9 3FJ.*

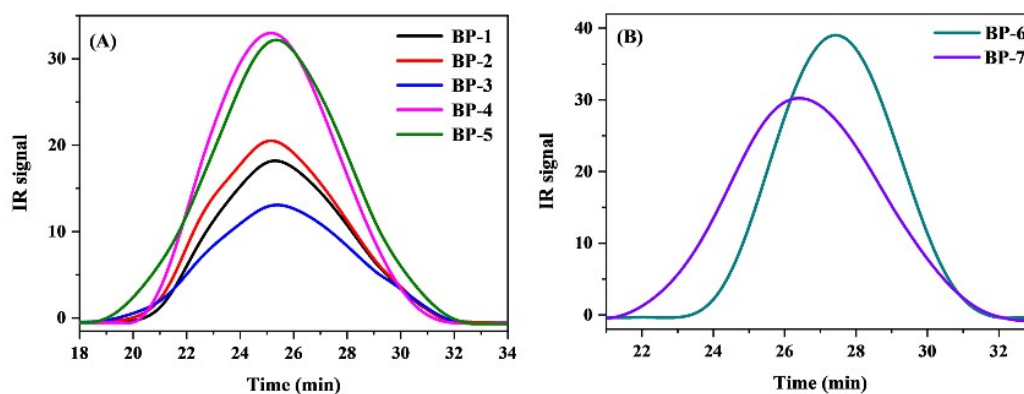

Fig. S1 SEC traces of branched poly(ether amide)s (A) BP-1, BP-2, BP-3, BP-3, BP-4 and BP-5, (B) BP-6 and B-7 prepared by oxa-Michael polymerization of MBA and various triols.

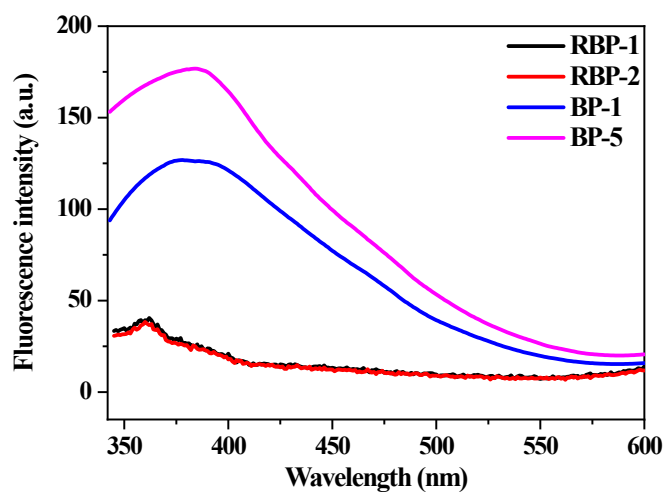

Fig. S2 Fluorescence spectra of branched poly(ether amide)s (BP-1, and BP-5) and their reference branched polymers (BRP-1, and BRP-2) in DMF solution. Polymer concentration=20 mg/mL,  $E_x=320$  nm, Temperature=15°C.

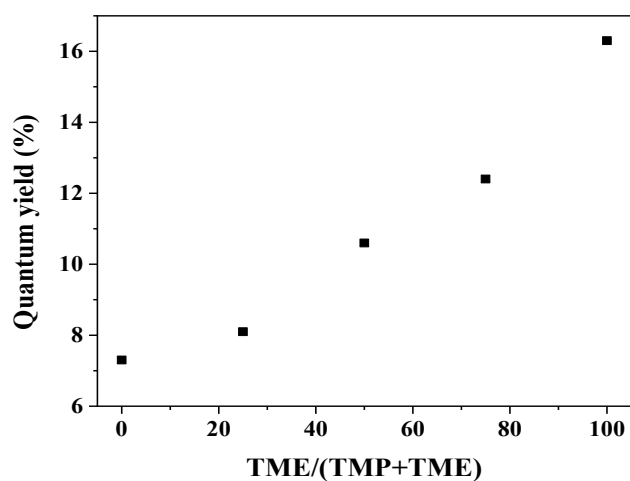

Fig. S3 Effect of TME/(TMP+TME) on quantum yield.

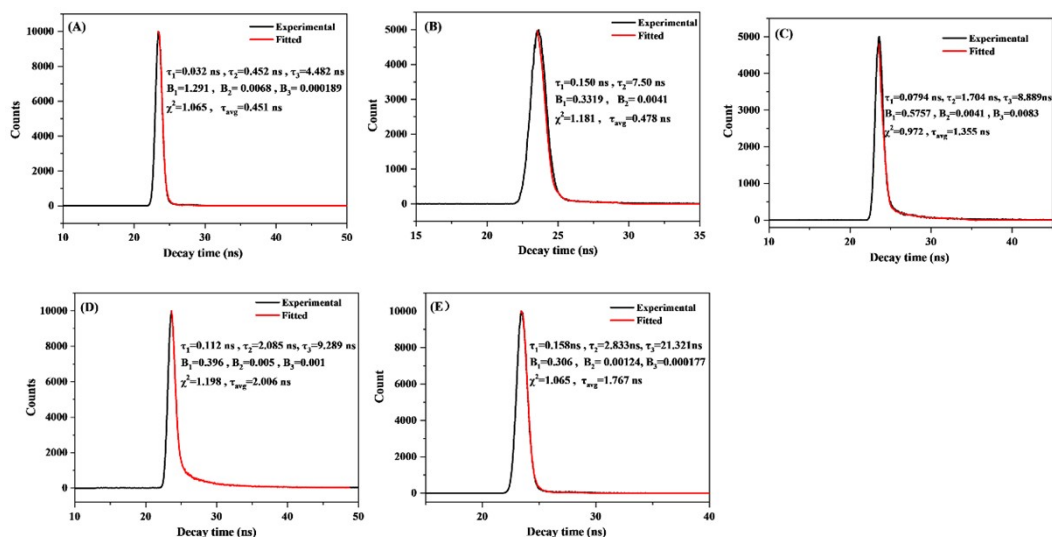

**Fig. S4** Fluorescence decay curves of branched poly(ether amide)s (A) BP-1, (B) BP-2, (C) BP-3, (D) BP-4, and (E) BP-5 in solid state with emission monitored at 395 nm after excitation at 320 nm.

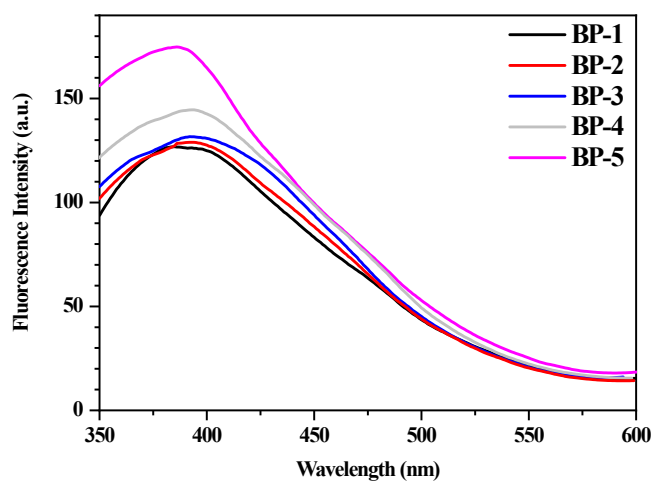

**Fig. S5** Fluorescence spectra of branched poly(ether amide)s (BP-1, BP-2, BP-3, BP-4, and BP-5) in DMF. Polymer concentration=20 mg/mL,  $E_x=320$  nm, Temperature=15°C.

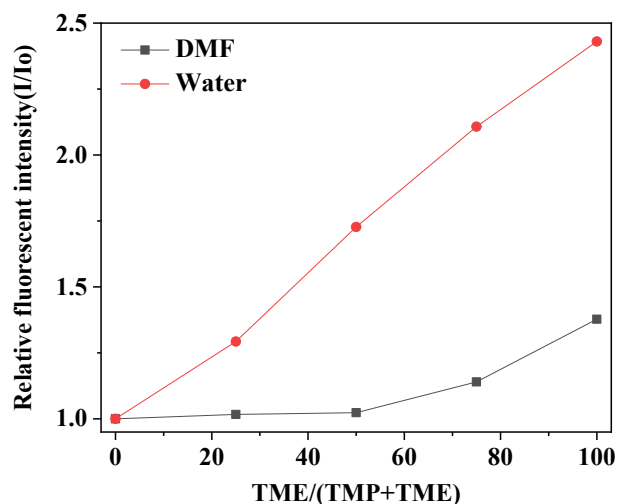

**Fig. S6** Relative fluorescent intensity ( $I/I_0$ ) of BP-1, BP-2, BP-3, BP-4, and BP-5 in DMF or water with different TME content;  $I$  is fluorescence intensity with different TME content,  $I_0$  is fluorescence intensity without TME content. Polymer concentration=20 mg/mL,  $E_x=320$  nm, Temperature=15°C.

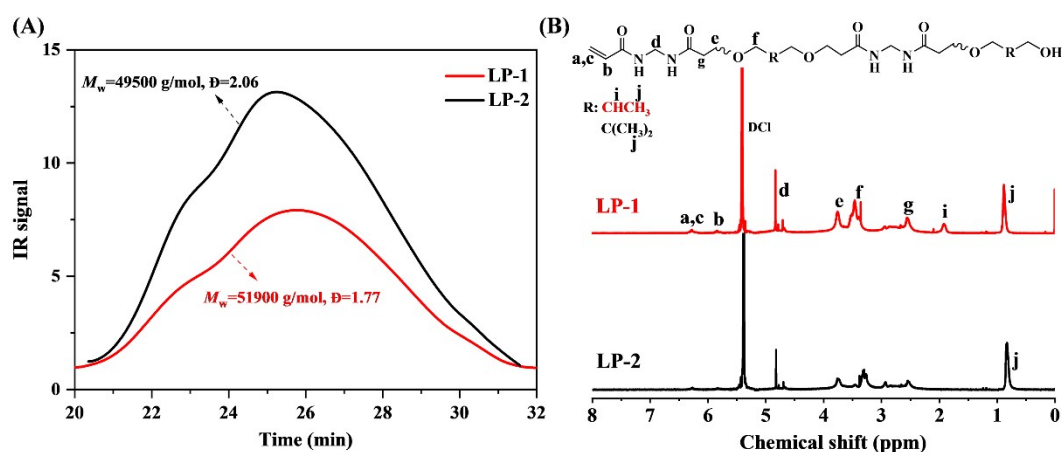

**Fig.S7** (A) SEC traces and (B)  $^1H$  NMR spectra of linear poly(ether amide)s (LP-1, and LP-2).

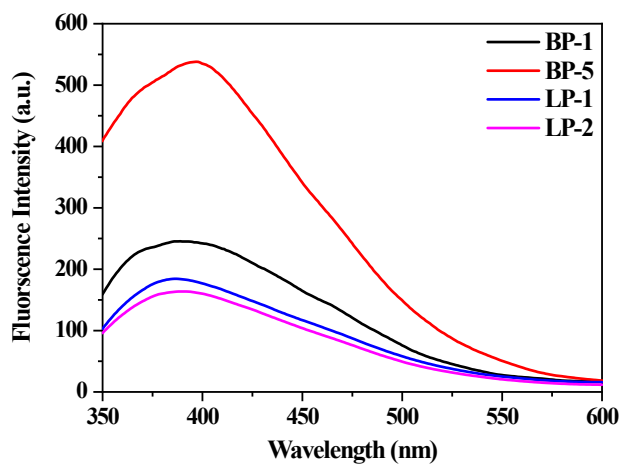

**Fig. S8** Fluorescence spectra of branched poly(ether amide)s (BP-1, and BP-5), and their linear analogous poly(ether amide)s (LP-1, and LP-2) in aqueous solution. Polymer concentration=20 mg/mL,  $E_x=320$  nm, Temperature=15°C.

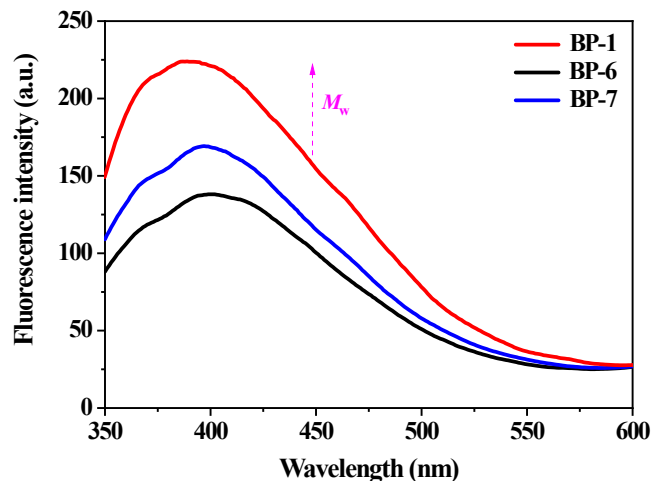

Fig.S9 Molecular weight dependence of fluorescence intensity of branched poly(ether amide)s. Polymer concentration=20 mg/mL,  $E_x=320$  nm, Temperature=15°C.

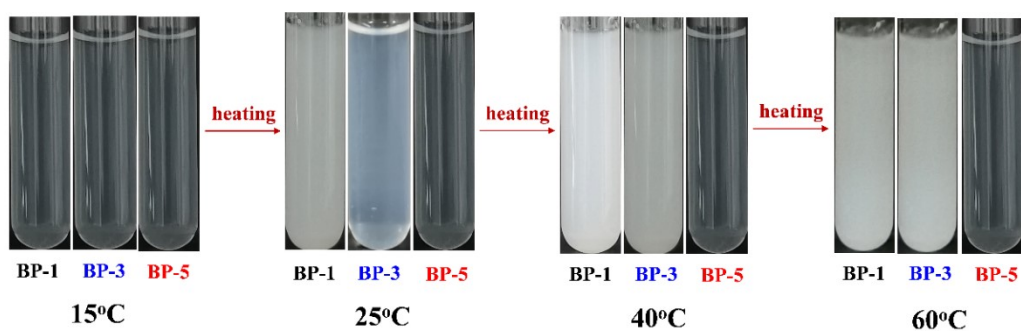

Fig.S10 The photographs of branched poly(ether amide)s (BP-1, BP-3 and BP-5) aqueous solution with a concentration of 20 mg/mL at 15 °C, 25 °C, 40 °C, and 60 °C.

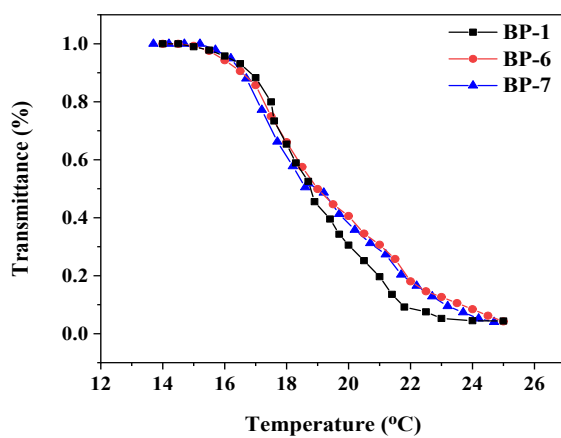

Fig. S11 Molecular weight dependence of light transmittance for aqueous solutions of branched poly(ether amide)s with a concentration of 20 mg/mL.

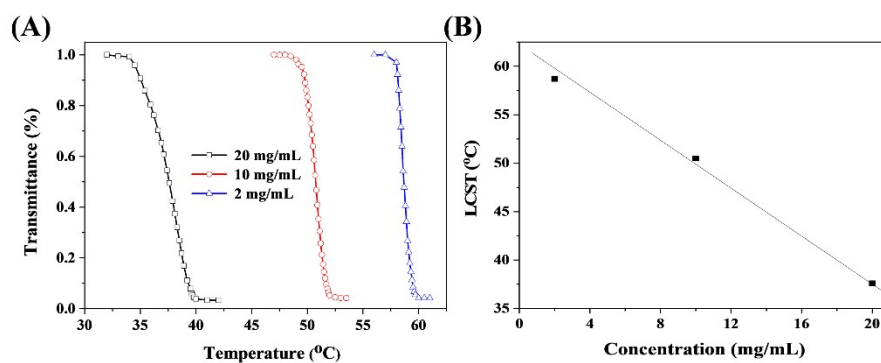

**Fig. S12** (A) Temperature dependence of light transmittance for aqueous solutions of branched poly(ether amide)s (BP-3) at different concentrations. (B) Effect of concentrations on LCST.
